# Supplementary material
Source: PubMed Central journal article supplement (PMC2492457)
Supplement: 0800244105_0800244105SI.pdf [file 0800244105_0800244105SI.pdf]

# Supporting Information

Williams and Lenton 10.1073/pnas.0800244105

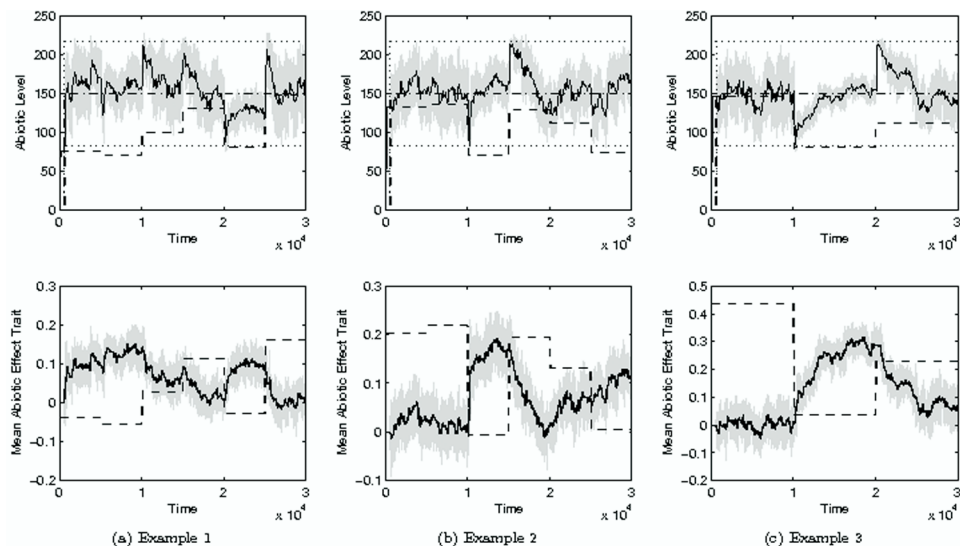

**Fig. S1.** Additional examples of environmental regulation. Data are shown for typical runs ( $F = 10$  flasks,  $R_D = 1\%$  diffusive between-flask mixing per time step) with random reassignment of external abiotic influx every 5,000 time steps (examples 1 and 2) or every 10,000 time steps (example 3). (*Upper*) The state of the abiotic environment (mean value across all flasks; the shaded area shows  $\pm 1$  SD) remains close to the ideal growth conditions (dash-dot line) and within the boundaries of the habitable region (dotted lines). The “dead” abiotic state (dashed line) shows the state of the environment if no organisms were present and demonstrates the perturbing effect of changes in external forcing. (*Lower*) The mean allele value across the whole community (solid line; the shaded area shows  $\pm 1$  SD) for genes controlling the metabolic by-product effects of organisms on the abiotic environment changes in response to external forcing [dashed line (not to scale)].





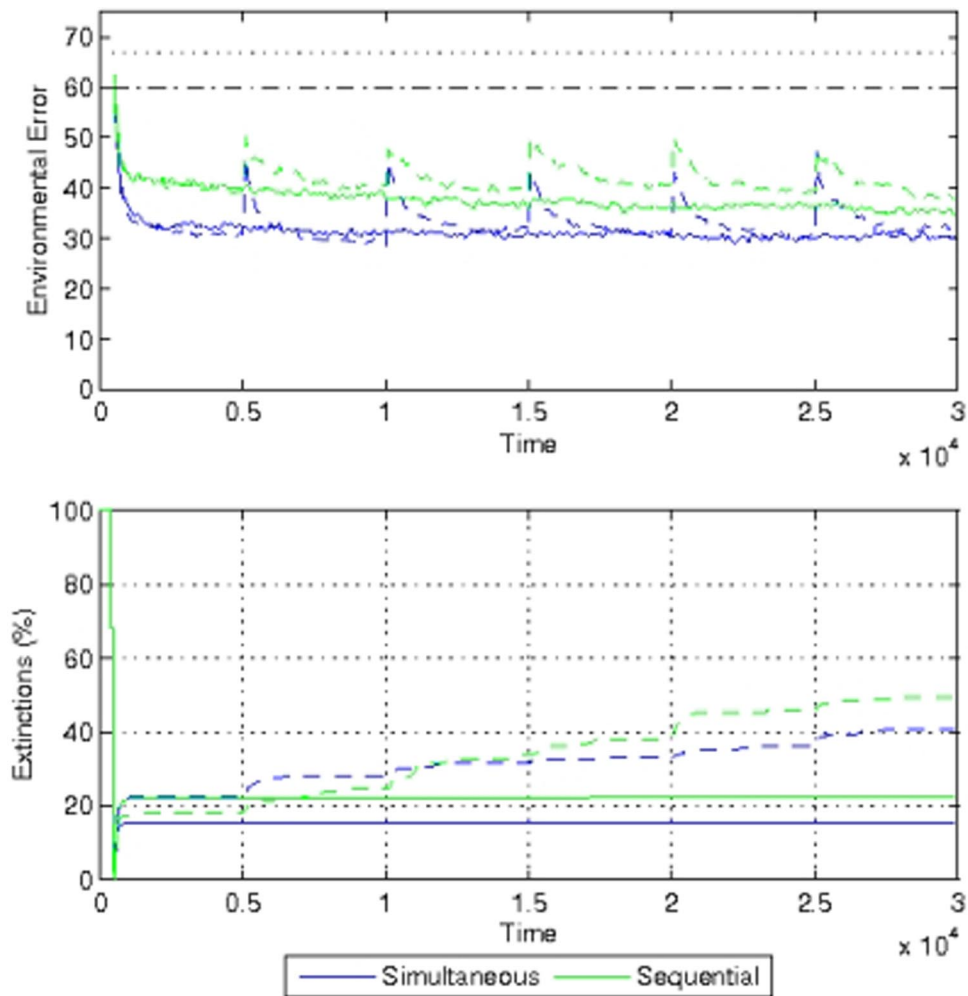

**Fig. S4.** Robustness of results to different update algorithms. Ensemble results showing error reduction and extinction rate over time for simultaneous and sequential update schemes demonstrate that qualitatively similar behavior is seen in both cases. Data are shown for ensembles (200 runs,  $F = 10$  flasks,  $R_D = 1\%$  diffusive between-flask mixing per time step) with random reassignment of external abiotic influx every 5,000 time steps. Simultaneous update is the standard form described in *Method and Model Description*. Sequential update is implemented by updating each individual in random sequence at each time step, with the order of update being randomized afresh at every iteration. Resources are allocated on a “first come, first served” basis until exhausted, and individual demand is not scaled to fit availability. Thus, when a nutrient is scarce, some individuals will receive their full requirement, whereas others will receive nothing. (Upper) Data for unperturbed (solid lines) and perturbed (dashed lines) ensembles are plotted together with habitability bound (dotted line) and predicted environmental error in absence of life (dash-dot line). Less error reduction is observed with sequential update than with simultaneous update, because in this scenario higher-level selection for environmental improvement is less effective. With sequential update, when nutrients are scarce, only a small subset of the community will metabolize nutrients (and thereby cause a by-product alteration to the abiotic environment) at each time step. The species composition of this subset is a random sample of the total community; thus, sampling error causes significant variance in net environmental effects at each time step. This introduces noise that weakens the correlation between community composition and environmental state and, hence, weakens the correlation between community “phenotype” and community “fitness.” This reduces the efficacy of the higher-level selection for environment-improving communities. However, the model with sequential update still demonstrates error reduction and environmental regulation. (Lower) Extinction data for unperturbed (solid lines) and perturbed (dashed lines) ensembles show that extinction rates are higher for sequential update than for simultaneous update, because the regulatory mechanism is less effective.

10.1073/pnas.0800244105

## Other Supporting Information Files

[SI Appendix 1 \(PDF\)](#)
